# Supplementary material for: Medication Knowledge and Adherence in Type 2 Diabetes Mellitus Patients in Brunei Darussalam: A Pioneer Study in Brunei Darussalam
Source: MDPI journal article supplement (doi:10.3390/ijerph19127470), 2022-06-18
Supplement: s1 [file s1]

Supplementary Information: Data collection form

Reference no.:

GENERAL INFORMATION

MAKLUMAT AM

Age/Umur

- ☐ <40 years old/tahun  
☐ 40–60 years old/tahun  
☐ >60 years old/tahun

**1. Gender/Jantina**

- ☐ Male/Lelaki  
☐ Female/Perempuan

**2. Race/Bangsa**

- ☐ Malay/Melayu  
☐ Chinese/Cina  
☐ Indian/India  
☐ Others (lain-lain): please specify/sila nyatakan

**3. Educational Level/Peringkat Pendidikan**

- ☐ No formal education/Tiada pendidikan formal  
☐ Primary school/Sekolah rendah  
☐ Secondary school/Sekolah menengah  
☐ Higher education/Pendidikan tinggi

**4. Occupation/Pekerjaan**

- ☐ Unemployed/Tidak bekerja  
☐ Student/Pelajar  
☐ Government sector/Sektor kerajaan  
☐ Private sector/Sektor swasta  
☐ Self-employed/Bekerja sendiri  
☐ Retired/Bersara

**5. Do you have a family history of diabetes?/Adakah anda mempunyai sejarah keluarga yang menghidap kencing manis?**

- ☐ Yes/Ya ☐ No/Tidak  
☐ Not sure/Kurang pasti

**6. How long have you been diagnosed with diabetes?/Berapa lama semenjak anda didiagnos dengan kencing manis?**

- ☐ Less than a year/tahun  
☐ 1–4 years/tahun  
☐ 5–9 years/tahun  
☐ ≥10 years/tahun

**7. How many medications are you currently taking?/Berapa jumlah ubat yang anda ambil sekarang?**  
medicines/ubat

**8. How many antidiabetic therapy are you taking?/Berapa jumlah ubat kencing manis yang anda ambil sekarang?**

medicines/ubat

**9. What is your antidiabetic therapy?/Apakah rawatan kencing manis anda?**

- ☐ Insulin only/Insulin sahaja  
☐ Insulin combined with oral medication/Insulin dan ubat oral kencing manis  
☐ Oral medication only/ubat oral kencing manis sahaja

---

**KNOWLEDGE ON DIABETES**

**PENGETAHUAN MENGENAI DIABETES**

---

[1]

**Table S1.** Diabetes Knowledge Questionnaire.

| Questions<br>Soalan                                                                                                                                                                                       | Yes<br>Ya | No<br>Tidak | I Don't Know<br>Kurang pasti |
|-----------------------------------------------------------------------------------------------------------------------------------------------------------------------------------------------------------|-----------|-------------|------------------------------|
| 1. Eating too much sugar and other sweet foods is a cause of diabetes.<br><i>Memakan gula dan makanan manis secara berlebihan boleh menyebabkan kencing manis.</i>                                        |           |             |                              |
| 2. The usual cause of diabetes is lack of effective insulin in the body.<br><i>Kencing manis adalah biasanya disebabkan oleh kekurangan insulin yang berkesan didalam badan.</i>                          |           |             |                              |
| 3. Diabetes is caused by failure of the kidneys to keep sugar out of the urine.<br><i>Kencing manis adalah disebabkan oleh kegagalan buah pinggang daripada mencegah gula masuk ke dalam air kencing.</i> |           |             |                              |
| 4. Kidneys produce insulin.<br><i>Buah pinggang menghasilkan insulin.</i>                                                                                                                                 |           |             |                              |
| 5. In untreated diabetes, the amount of sugar in the blood usually increases.<br><i>Jika kencing manis tidak dirawat, jumlah gula dalam darah biasanya meningkat.</i>                                     |           |             |                              |
| 6. If I am diabetic, my children have a higher chance of being diabetic.<br><i>Sekiranya saya menghidap kencing manis, anak saya mempunyai peluang lebih tinggi untuk menghidap kencing manis.</i>        |           |             |                              |
|                                                                                                                                                                                                           | Yes<br>Ya | No<br>Tidak | I don't know<br>Kurang pasti |
| 7. Diabetes can be cured.<br><i>Kencing manis dapat disembuhkan.</i>                                                                                                                                      |           |             |                              |
| 8. A fasting blood sugar level of 11.7 mmol/L is too high.<br><i>Tahap gula darah berpuasa 11.7 mmol/L adalah terlalu tinggi.</i>                                                                         |           |             |                              |
| 9. The best way to check my diabetes is by testing my urine.<br><i>Cara terbaik untuk memeriksa kencing manis saya adalah dengan menguji air kencing saya.</i>                                            |           |             |                              |
| 10. Regular exercise will increase the need for insulin or other diabetic medication.<br><i>Senaman secara kerap akan meningkatkan keperluan insulin atau ubat kencing manis.</i>                         |           |             |                              |

11. There are two main types of diabetes: Type 1 (insulin-dependant) and Type 2 (non-insulin-dependant).

*Terdapat dua jenis diabetes yang utama: Jenis 1 (bergantung kepada insulin) dan Jenis 2 (tidak bergantung kepada insulin).*

12. An insulin reaction (severe hypoglycemia) is caused by too much food.

*Terlalu banyak makanan boleh menyebabkan reaksi insulin (paras gula dalam darah yang terlampau rendah).*

13. Medication is more important than diet and exercise to control my diabetes.

*Ubat adalah lebih penting daripada diet dan senaman untuk mengawal kencing manis saya.*

14. Diabetes often causes poor circulation.

*Kencing manis sering menyebabkan peredaran darah yang lemah.*

Yes  
Ya

No  
Tidak

I don't know  
Kurang pasti

15. Cuts and abrasions on diabetics heal more slowly.

*Luka dan melecet pada pesakit kencing manis sembuh dengan lebih perlahan.*

16. Diabetics should take extra care when cutting their toenails.

*Pesakit kencing manis perlu berhati-hati apabila memotong kuku kaki.*

17. A person with diabetes should cleanse a cut with iodine and alcohol.

*Pesakit kencing manis harus membersihkan luka dengan iodine dan alkohol.*

18. The way I prepare my food is as important as the foods I eat.

*Cara saya menyediakan makanan (goreng, rebus) adalah sama pentingnya dengan jenis makanan yang saya makan.*

19. Diabetes can damage my kidneys.

*Kencing manis boleh merosakkan buah pinggang saya.*

20. Diabetes can cause loss of feelings in my hands, fingers, and feet.

*Kencing manis boleh menyebabkan kehilangan sensasi di tangan, jari dan kaki saya.*

21. Shaking and sweating are signs of high blood sugar.

*Menggigil dan berpeluh adalah tanda paras gula dalam darah yang tinggi.*

Yes  
Ya

No  
Tidak

I Don't Know  
Kurang pasti

22. Frequent urination and thirst are signs of low blood sugar.

*Kerap buang air kecil dan kerap dahaga adalah tanda paras gula dalam darah yang rendah.*

23. Tight elastic hose or socks are not bad for diabetics.

*Stokin anjal yang ketat tidak mempunyai kesan buruk kepada pesakit diabetes.*

24. A diabetic diet consists mostly of special foods.

*Diet pesakit kencing manis kebanyakannya terdiri daripada makanan yang istimewa. [1]*

## KNOWLEDGE ON ANTIDIABETIC MEDICATIONS

[2]

**Table S2.** Diabetes Medication Knowledge Questionnaire

| Questions<br>Soalan                                                                                                                                                     | Yes<br>Ya | No<br>Tidak |
|-------------------------------------------------------------------------------------------------------------------------------------------------------------------------|-----------|-------------|
| Can you list the name of antidiabetic medication(s) you are currently taking?<br><i>Bolehkah anda menyenaraikan nama ubat kencing manis yang anda sedang ambil?</i>     |           |             |
| Can you tell me why you are taking the antidiabetic medication(s)?<br><i>Bolehkah anda beritahu mengapa anda mengambil ubat kencing manis?</i>                          |           |             |
| Do you know how to take the medication(s)?<br><i>Adakah anda tahu cara mengambil ubat-ubatan anda?</i>                                                                  |           |             |
| Do you know when to take the medication(s)?<br><i>Adakah anda tahu bila anda perlu makan/ambil ubat-ubatan anda?</i>                                                    |           |             |
| Do you know the possible side effects of the medication(s)?<br><i>Adakah anda tahu kemungkinan kesan sampingan ubat-ubatan anda?</i>                                    |           |             |
| Do you know what to do if your medication's side effects occur?<br><i>Adakah anda tahu apa yang harus dilakukan sekiranya kesan sampingan ubat-ubatan anda berlaku?</i> |           |             |
| Do you know what to do if you miss a dose of your medication(s)?<br><i>Adakah anda tahu apa yang perlu dilakukan jika anda terlepas satu dos ubat anda?</i>             |           |             |

#### ANTIDIABETIC MEDICATION ADHERENCE

#### PEMATUHAN TERHADAP UBAT-UBATAN KENCING MANIS

[3]

Do you take the prescribed antidiabetic medications as advised by your doctor?

*Adakah anda mengambil ubat-ubatan kencing manis seperti yang diarahkan oleh doktor anda?*

☐ Yes/Ya      ☐ No/Tidak

If No, please tick the options below (/)

*Jika Tidak, sila tandakan sebab berkaitan dengan anda (/)*

**Table S3.** Diabetes Medication Adherence Questionnaire.

| Yes                                                                     | No | Yes                                                                    | No |
|-------------------------------------------------------------------------|----|------------------------------------------------------------------------|----|
| Lack of finance/Masalah kewangan                                        |    | Side effects/Kesan sampingan                                           |    |
| Feeling medication is not effective/Saya rasa ubat tidak berkesan       |    | Feeling the dose given is high/Terasa dos yang diberikan adalah tinggi |    |
| Interferes with my meal plan/Mengganggu pelan peranakan saya            |    | Complexity of medication regimen/Rejimen ubat yang rumit               |    |
| Taking them since many years/Mengambil ubat-ubatan sejak bertahun-tahun |    | Multiple medications/Mengambil ubat-ubatan yang banyak                 |    |
| I forget/Saya lupa                                                      |    | Poor family support/Kurang sokongan keluarga                           |    |
| Others/lain-lain:                                                       |    |                                                                        |    |

| Items                                                                                                                                     | Yes | No |
|-------------------------------------------------------------------------------------------------------------------------------------------|-----|----|
| Do you regularly monitor your blood glucose?<br><i>Adakah anda sentiasa memantau paras gula dalam darah anda?</i>                         |     |    |
| Do you know the importance of your medications?<br><i>Adakah anda tahu kepentingan ubat-ubatan anda?</i>                                  |     |    |
| Did your doctor give information on diabetes?<br><i>Adakah doktor anda memberi maklumat tentang penyakit kencing manis?</i>               |     |    |
| Did your doctor give information antidiabetic medications?<br><i>Adakah doktor anda memberi maklumat tentang ubat kencing manis anda?</i> |     |    |
| Were you involved in treatment decisions?<br><i>Adakah anda terlibat dalam membuat keputusan untuk rawatan anda?</i>                      |     |    |
| Do you feel comfortable asking questions to your doctors?<br><i>Adakah anda berasa selesa bertanya soalan kepada doktor anda?</i>         |     |    |

#### Reference

- [1] Garcia, A., Villagomez, E., Brown, S., Kouzekanani, K., and Hanis, C. (2001). The Starr County Diabetes Education Study: Development of the Spanish-language diabetes knowledge questionnaire. *Diabetes Care*, 24(1), 16-21. doi: 10.2337/diacare.24.1.16
- [2] Mekonnen, G., and Gelayee, D. (2020). Low Medication Knowledge and Adherence to Oral Chronic Medications among Patients Attending Community Pharmacies: A Cross-Sectional Study in a Low-Income Country. *Biomed Research International*, 2020, 1-8. doi: 10.1155/2020/4392058
- [3] Arifulla M, John L, Sreedharan J, Muttappallymyalil J, Basha S. Patients' Adherence to Anti-Diabetic Medications in a Hospital at Ajman, UAE. *Malays J Med Sci*. 2014;21(1):44-49.
